# Supplementary material
Source: PubMed Central journal article supplement (PMC8856568)
Supplement: NIHMS1776435-supplement-Supplemental_Tables.pdf [file NIHMS1776435-supplement-Supplemental_Tables.pdf]

## SUPPLEMENTAL TABLES

**Supplemental Table 1. Short-term effects of cleaning-related exposures on FEV1 and PEF among 21 professional female cleaners stratified by atopy (n=312 person-days).**

|                                | Nocturnal                    |                      |                                |                              | Morning following exposure     |                              |                                 |                              |
|--------------------------------|------------------------------|----------------------|--------------------------------|------------------------------|--------------------------------|------------------------------|---------------------------------|------------------------------|
|                                | Atopics                      |                      | Non atopics                    |                              | Atopics                        |                              | Non atopics                     |                              |
|                                | FEV <sub>1</sub> (mL)        | PEF (L/min)          | FEV <sub>1</sub> (mL)          | PEF (L/min)                  | FEV <sub>1</sub> (mL)          | PEF (L/min)                  | FEV <sub>1</sub> (mL)           | PEF (L/min)                  |
| <b>Products</b>                |                              |                      |                                |                              |                                |                              |                                 |                              |
| <b>No use of any product</b>   | Ref.                         | Ref.                 | Ref.                           | Ref.                         | Ref.                           | Ref.                         | Ref.                            | Ref.                         |
| Bleach                         | 34.9 (-126.5-196.2)          | -0.1 (-31.9-31.7)    | -191.8 (-393.3-9.7)            | -28.6 (-66.1-8.9)            | 120.0 (-55.5-295.5)            | -8.0 (-45.8-29.8)            | <b>-263.0 (-469.8--56.2)</b>    | -20.7 (-61.3-19.9)           |
| Ammonia                        | 149.6 (-140.8-440.1)         | 8.9 (-59.8-77.6)     | <b>-864.8 (-1310.9--418.6)</b> | -12.4 (-158.6-133.8)         | 10.2 (-326.5-346.9)            | -58.7 (-142.5-25.2)          | <b>-1163.5 (-1675.0--652.0)</b> | -133.9 (-304.7-36.9)         |
| Multi-use product              | 180.7 (-8.0-369.5)           | 8.4 (-32.8-49.6)     | 5.6 (-146.3-157.5)             | -10.5 (-46.0-25.0)           | 259.2 (50.5-467.8)             | -20.0 (-63.6-23.6)           | <b>-189.2 (-358.3--20.2)</b>    | -33.5 (-72.4-5.5)            |
| Hydrochloric acid              | --                           | --                   | <b>-749.8 (-1002.3--497.3)</b> | 30.4 (-20.7-81.5)            | 973.4 (338.8-1608.0)           | 86.0 (-73.2-245.3)           | <b>-728.0 (-1053.0--403.0)</b>  | <b>93.4 (29.1-157.7)</b>     |
| Glass cleaner                  | 139.4 (-59.3-338.0)          | -0.5 (-45.3-44.3)    | -29.7 (-219.6-160.3)           | -12.9 (-53.0-27.2)           | 130.3 (-94.0-354.6)            | -46.6 (-93.6-0.4)            | <b>-177.4 (-327.4--27.5)</b>    | -7.0 (-48.9-35.0)            |
| Wax/polishes                   | <b>-260.0 (-500.1--20.0)</b> | -38.7 (-103.9-26.6)  | -281.7 (-618.3-54.8)           | 79.1 (-31.9-190.0)           | 44.9 (-307.0-396.8)            | -3.7 (-86.8-79.5)            | -355.6 (-734.6-23.3)            | -95.0 (-223.0-32.9)          |
| Dust mop product               | <b>-183.2 (-364.6--1.8)</b>  | -18.3 (-68.0-31.3)   | -57.4 (-236.5-121.7)           | -18.5 (-68.0-31.0)           | -160.7 (-468.1-146.7)          | <b>-91.5 (-166.8--16.2)</b>  | <b>-170.0 (-303.6--36.4)</b>    | -46.0 (-93.2-1.2)            |
| Carpet cleaner                 | --                           | --                   | -290.8 (-617.5-35.9)           | -27.5 (-135.2-80.2)          | --                             | --                           | -224.2 (-559.6-111.1)           | -28.5 (-141.7-84.8)          |
| Degreaser                      | 65.1 (-193.6-323.9)          | -3.1 (-53.0-46.8)    | -286.4 (-504.5--68.2)          | <b>-40.1 (-78.8--1.4)</b>    | 397.1 (121.7-672.4)            | 24.6 (-44.8-94.0)            | <b>-519.0 (-672.6--365.5)</b>   | -24.0 (-76.1-28.2)           |
| Solvent                        | -322.3 (-665.9-21.3)         | -13.2 (-148.0-121.6) | <b>-895.0 (-1190.9--599.1)</b> | <b>-112.9 (-206.0--19.7)</b> | <b>-956.0 (-1512.6--399.4)</b> | <b>-235.7 (-401.8--69.5)</b> | <b>-1281.9 (-1624.5--939.4)</b> | <b>-163.4 (-274.5--52.3)</b> |
| Powder soap/detergent          | 27.7 (-284.5-339.9)          | 10.4 (-73.4-94.2)    | -288.1 (-498.1--78.1)          | -9.0 (-70.4-52.4)            | -137.1 (-554.5-280.2)          | <b>-101.7 (-202.1--1.3)</b>  | <b>-514.8 (-781.3--248.4)</b>   | -4.6 (-86.1-76.8)            |
| Liquid soap/detergent          | -117.4 (-262.6-27.8)         | -18.7 (-50.2-12.8)   | -53.0 (-232.5-126.5)           | -2.6 (-43.1-37.8)            | -113.0 (-324.6-98.7)           | -12.2 (-57.8-33.4)           | <b>-183.9 (-366.2--1.5)</b>     | -15.6 (-56.5-25.2)           |
| Limescale remover              | 84.6 (-164.7-333.9)          | -23.1 (-80.6-34.3)   | -225.4 (-424.4--26.4)          | 18.4 (-37.9-74.8)            | 163.5 (-110.0-437.0)           | -42.7 (-107.1-21.6)          | -197.9 (-453.1-57.2)            | -25.9 (-85.5-33.7)           |
| Air freshener                  | 42.9 (-176.7-262.6)          | -23.4 (-73.9-27.0)   | -166.2 (-378.1-45.8)           | -3.8 (-46.1-38.5)            | 19.6 (-222.2-261.5)            | -47.9 (-105.3-9.6)           | <b>-417.7 (-620.0--215.5)</b>   | -19.0 (-66.5-28.5)           |
| Any irritant                   | 34.9 (-126.5-196.2)          | -0.1 (-31.9-31.7)    | -191.8 (-390.8-7.3)            | -28.9 (-66.0-8.1)            | 120.0 (-55.5-295.5)            | -8.0 (-45.8-29.8)            | <b>-265.0 (-469.5--60.5)</b>    | -21.1 (-61.4-19.3)           |
| Number of different products** |                              |                      |                                |                              |                                |                              |                                 |                              |
| 1-3                            | 96.8 (-92.2-285.8)           | 7.3 (-30.1-44.6)     | -189.0 (-384.1-6.1)            | -34.1 (-71.7-3.5)            | <b>208.7 (21.8-395.6)</b>      | -2.4 (-41.3-36.5)            | -208.0 (-409.2--6.8)            | -19.6 (-58.0-18.7)           |
| ≥4                             | -41.3 (-262.6-179.9)         | -10.2 (-53.6-33.2)   | -129.6 (-313.2-54.1)           | -13.6 (-49.1-22.0)           | 79.0 (-139.7-297.8)            | -45.2 (-91.2-0.7)            | -219.8 (-416.1--23.4)           | -14.6 (-52.2-23.1)           |
| Number of different sprays**   |                              |                      |                                |                              |                                |                              |                                 |                              |
| 1-2                            | -170.9 (-348.0-6.2)          | -14.8 (-62.4-32.8)   | -149.1 (-344.6-46.4)           | -10.7 (-50.6-29.2)           | --                             | --                           | --                              | --                           |
| ≥3                             | <b>-232.0 (-393.1--70.8)</b> | -34.6 (-77.2-8.0)    | -130.4 (-334.5-73.6)           | -45.0 (-90.5-0.5)            | -0.9 (-288.6-286.7)            | -10.8 (-74.4-52.8)           | -318.2 (-505.2--131.2)          | -13.9 (-61.2-33.4)           |

Coefficients and 95% confidence intervals from linear regression mixed models adjusted by age, height, num. of cigarettes smoked, presence of flu or cold symptoms and respiratory medication. Random effect term by subject included in all models. \* Unit of analysis: 100 times the daily maximum minus daily minimum divided by daily mean. \*\* Reference: Zero.

## SUPPLEMENTAL TABLES

**Supplemental table 2. Short-term effects of cleaning-related exposures on diurnal variation of FEV1 and PEF among 21 professional female cleaners stratified by atopy (n=312 person-days).**

|                                | Diurnal variation       |                         |                       |                   |
|--------------------------------|-------------------------|-------------------------|-----------------------|-------------------|
|                                | Atopics                 |                         | Non atopics           |                   |
|                                | FEV <sub>1</sub> (mL)   | PEF (L/min)             | FEV <sub>1</sub> (mL) | PEF (L/min)       |
| <b>Products</b>                |                         |                         |                       |                   |
| <b>No use of any product</b>   | Ref.                    | Ref.                    | Ref.                  | Ref.              |
| Bleach                         | 2.4 (-3.3-8.1)          | 3.9 (-4.7-12.5)         | 1.0 (-4.5-6.4)        | -3.8 (-12.2-4.6)  |
| Ammonia                        | <b>11.4 (1.5-21.3)</b>  | <b>23.0 (8.2-37.8)</b>  | 0.5 (-23.5-24.5)      | 4.8 (-36.5-46.1)  |
| Multi-use product              | 7.3 (-0.3-15.0)         | <b>11.5 (0.4-22.6)</b>  | 2.4 (-4.5-9.3)        | -2.8 (-13.6-7.9)  |
| Hydrochloric acid              | 7.8 (-10.3-25.9)        | <b>28.9 (0.2-57.6)</b>  | 2.5 (-5.1-10.2)       | 1.0 (-12.3-14.3)  |
| Glass cleaner                  | 7.1 (-0.2-14.3)         | <b>13.2 (2.1-24.3)</b>  | 3.4 (-3.6-10.4)       | -8.4 (-18.4-1.6)  |
| Wax/polishes                   | 11.4 (-0.1-23.0)        | 10.3 (-6.6-27.3)        | -8.9 (-22.3-4.5)      | -20.2 (-43.6-3.3) |
| Dust mop product               | -0.9 (-8.7-6.9)         | -2.1 (-14.6-10.4)       | 3.8 (-4.1-11.7)       | 5.5 (-7.4-18.4)   |
| Carpet cleaner                 | --                      | --                      | 4.0 (-12.5-20.5)      | 2.0 (-27.3-31.3)  |
| Degreaser                      | 5.5 (-2.8-13.8)         | 9.1 (-3.5-21.8)         | -1.1 (-6.0-3.9)       | -8.6 (-15.6--1.6) |
| Solvent                        | 3.6 (-11.9-19.0)        | <b>26.6 (2.1-51.1)</b>  | -0.5 (-15.6-14.6)     | 7.8 (-18.9-34.5)  |
| Powder soap/detergent          | <b>22.3 (10.5-34.0)</b> | <b>40.7 (23.9-57.6)</b> | 2.4 (-6.1-11.0)       | -0.9 (-15.9-14.1) |
| Liquid soap/detergent          | 5.0 (-1.1-11.1)         | 6.8 (-2.1-15.8)         | 4.9 (-0.9-10.8)       | 2.0 (-7.1-11.1)   |
| Limescale remover              | <b>12.2 (3.1-21.3)</b>  | <b>21.5 (7.8-35.3)</b>  | -0.1 (-9.3-9.1)       | -8.9 (-23.3-5.4)  |
| Air freshener                  | <b>14.4 (7.0-21.9)</b>  | <b>20.6 (8.7-32.5)</b>  | 2.4 (-3.6-8.5)        | -0.6 (-10.8-9.7)  |
| Any irritant                   | 2.4 (-3.3-8.1)          | 3.9 (-4.7-12.5)         | 1.1 (-4.3-6.5)        | -3.6 (-11.9-4.8)  |
| Number of different products** |                         |                         |                       |                   |
| 1-3                            | 5.3 (-3.3-14.0)         | 9.9 (-2.5-22.2)         | -3.3 (-9.2-2.7)       | -0.6 (-9.5-8.4)   |
| ≥4                             | <b>11.7 (2.7-20.8)</b>  | 12.5 (-0.5-25.4)        | 2.4 (-2.7-7.5)        | -10.5 (-22.6-1.7) |
| Number of different sprays**   |                         |                         |                       |                   |
| 1-2                            | -0.8 (-6.4-4.8)         | -2.0 (-10.3-6.2)        | 1.0 (-4.3-6.4)        | -6.5 (-15.7-2.8)  |
| ≥3                             | <b>10.7 (3.8-17.6)</b>  | <b>17.2 (7.1-27.3)</b>  | -3.5 (-10.7-3.7)      | -2.5 (-10.4-5.5)  |

Coefficients and 95% confidence intervals from linear regression mixed models adjusted by age, height, num. of cigarettes smoked, presence of flu or cold symptoms and respiratory medication. Random effect term by subject included in all models. \* Unit of analysis: 100 times the daily maximum minus daily minimum divided by daily mean. \*\* Reference: Zero.
